# Supplementary material for: Ambient pressure synthesis of Eu3+doped δ-BiB3O6by seed-assisted high temperature solid state reactions
Source: Royal Society of Chemistry journal article supplement (doi:10.1039/d0dt00895h), 2020-01-01
Supplement: d0dt00895h1.pdf [file d0dt00895h1.pdf]

Electronic Supplementary Information for

Ambient pressure synthesis of  $\text{Eu}^{3+}$  doped  $\delta\text{-BiB}_3\text{O}_6$  by seed-  
assisted high temperature solid state reactions

*Yunwei Zhao,<sup>a</sup> Pengfei Jiang,<sup>a</sup> Wenliang Gao,<sup>a</sup> Rihong Cong,<sup>a\*</sup> Jing Ju,<sup>b\*</sup> Tao Yang<sup>a</sup>*

<sup>a</sup>College of Chemistry and Chemical Engineering, Chongqing University, Chongqing

401331, P. R. China

<sup>b</sup>College of Chemistry and Molecular Engineering, Peking University, Beijing 100871,

P. R. China

\*E-mails: [congrihong@cqu.edu.cn](mailto:congrihong@cqu.edu.cn); [jingju@pku.edu.cn](mailto:jingju@pku.edu.cn)

Table S1. Atomic coordinate, occupancy factors, and isotropic thermal displacement factors obtained from the Rietveld refinements for  $\delta\text{-Bi}_{0.8}\text{La}_{0.2}\text{B}_3\text{O}_6$

| Atom  | <i>x</i>   | <i>y</i>  | <i>z</i> | Occupancy       | $U_{\text{iso}}(\text{\AA}^2)$ |
|-------|------------|-----------|----------|-----------------|--------------------------------|
| Bi/La | 0.83843(3) | 0.1624(1) | 0.700(3) | 0.80(3)/0.20(3) | 0.0224(3)                      |
| B1    | 0.793(1)   | 0.650(6)  | 1.15(1)  | 1               | 0.047(5)                       |
| B2    | 0.9303(10) | 0.651(8)  | 1.127(9) | 1               | 0.047(5)                       |
| B3    | 0.9970(12) | 0.182(6)  | 1.111(8) | 1               | 0.047(5)                       |
| O1    | 0.8002(4)  | 0.319(4)  | 1.143(5) | 1               | 0.024(3)                       |
| O2    | 0.9421(5)  | 0.352(4)  | 1.065(4) | 1               | 0.024(3)                       |
| O3    | 0.8533(5)  | -0.247(2) | 1.023(4) | 1               | 0.024(3)                       |
| O4    | 0.7197(5)  | 0.738(2)  | 0.991(4) | 1               | 0.024(3)                       |
| O5    | 1.0668(6)  | 0.273(3)  | 0.981(4) | 1               | 0.024(3)                       |
| O6    | 0.9852(6)  | -0.130(3) | 0.973(3) | 1               | 0.024(3)                       |

Table S2. Selected bond lengths from Rietveld refinements for  $\delta\text{-Bi}_{0.8}\text{La}_{0.2}\text{B}_3\text{O}_6$

| Bond  | Length (Å) | Bond  | Length (Å) | Bond  | Length (Å) |
|-------|------------|-------|------------|-------|------------|
| Bi-O1 | 2.14(2)    | B1-O3 | 1.34(3)    | B2-O6 | 1.56(3)    |
| Bi-O3 | 2.31(2)    | B1-O1 | 1.48(3)    | B2-O3 | 1.56(3)    |
| Bi-O4 | 2.35(1)    | B1-O4 | 1.51(5)    |       |            |
| Bi-O1 | 2.58(2)    | B1-O4 | 1.56(3)    | B3-O2 | 1.28(3)    |
| Bi-O2 | 2.61(2)    |       |            | B3-O5 | 1.46(3)    |
| Bi-O1 | 2.662(9)   | B2-O2 | 1.37(4)    | B3-O6 | 1.52(3)    |
| Bi-O5 | 2.77(1)    | B2-O5 | 1.56(4)    | B3-O6 | 1.60(4)    |

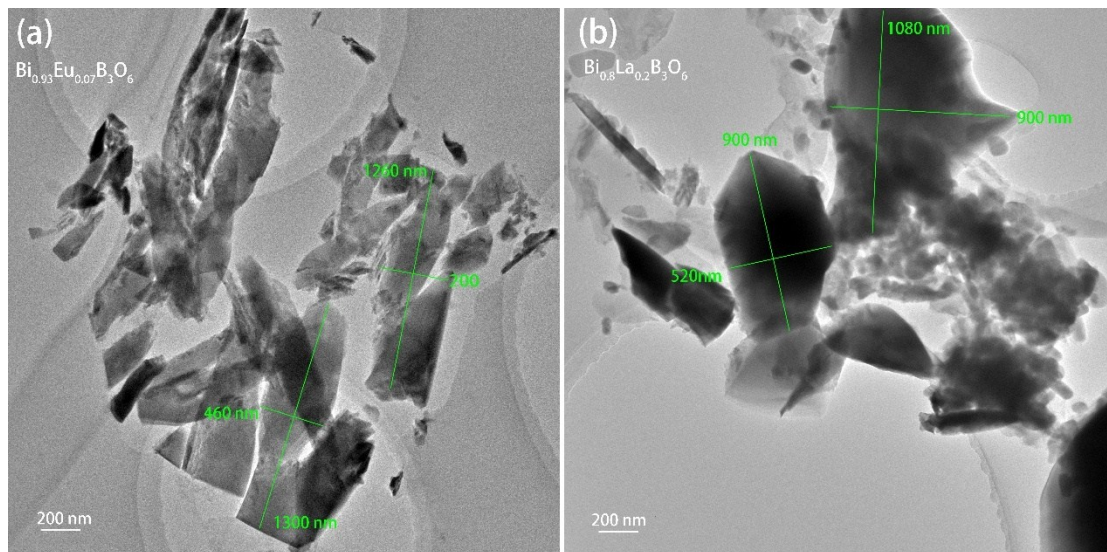

Figure S1. TEM images for (a)  $\delta\text{-Bi}_{0.93}\text{Eu}_{0.07}\text{B}_3\text{O}_6$  and (b)  $\delta\text{-Bi}_{0.8}\text{La}_{0.2}\text{B}_3\text{O}_6$ .

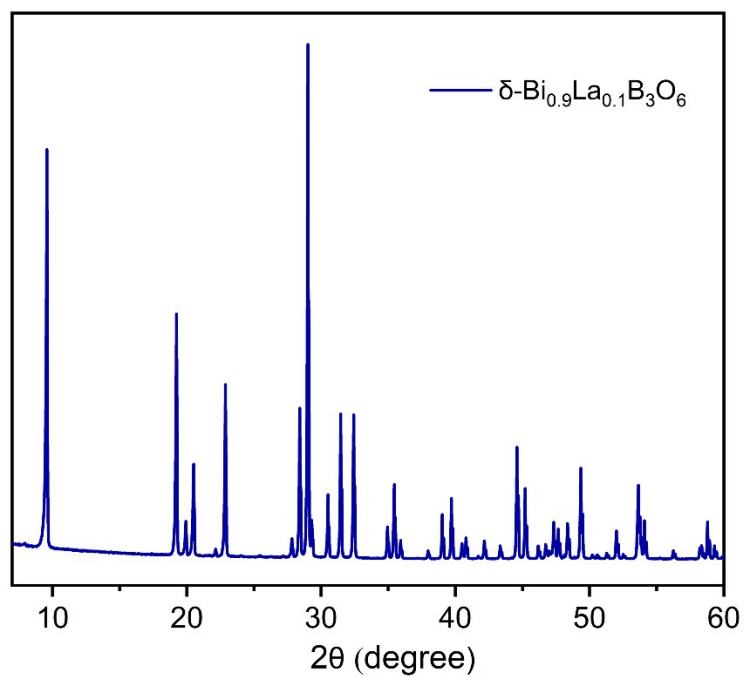

Figure S2. Powder XRD pattern of  $\delta\text{-Bi}_{0.9}\text{La}_{0.1}\text{B}_3\text{O}_6$ .

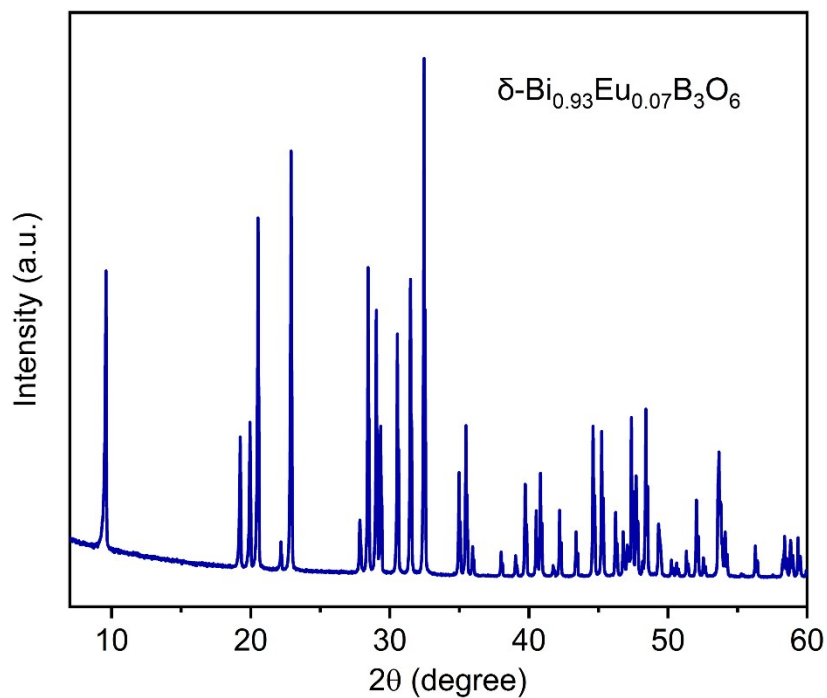

Figure S3. Powder XRD pattern of  $\delta\text{-Bi}_{0.93}\text{Eu}_{0.07}\text{B}_3\text{O}_6$ .

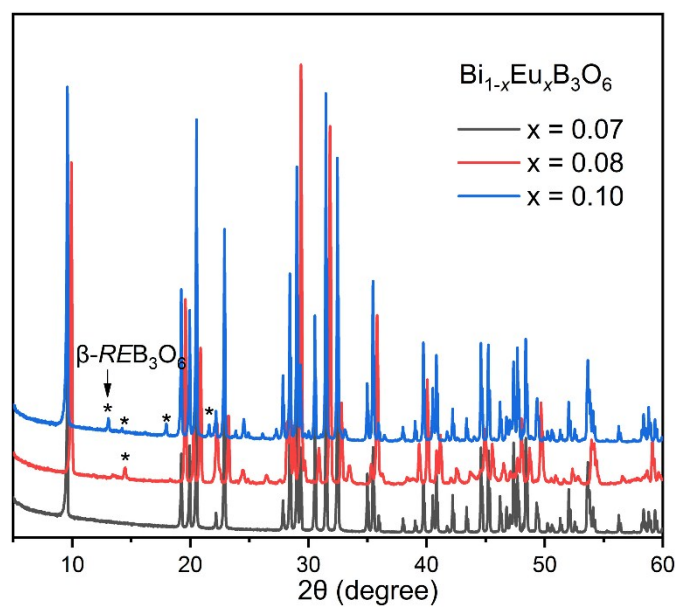

Figure S4. Powder XRD for the synthesis of  $\delta\text{-Bi}_{1-x}\text{Eu}_x\text{B}_3\text{O}_6$  with different  $x$  values.

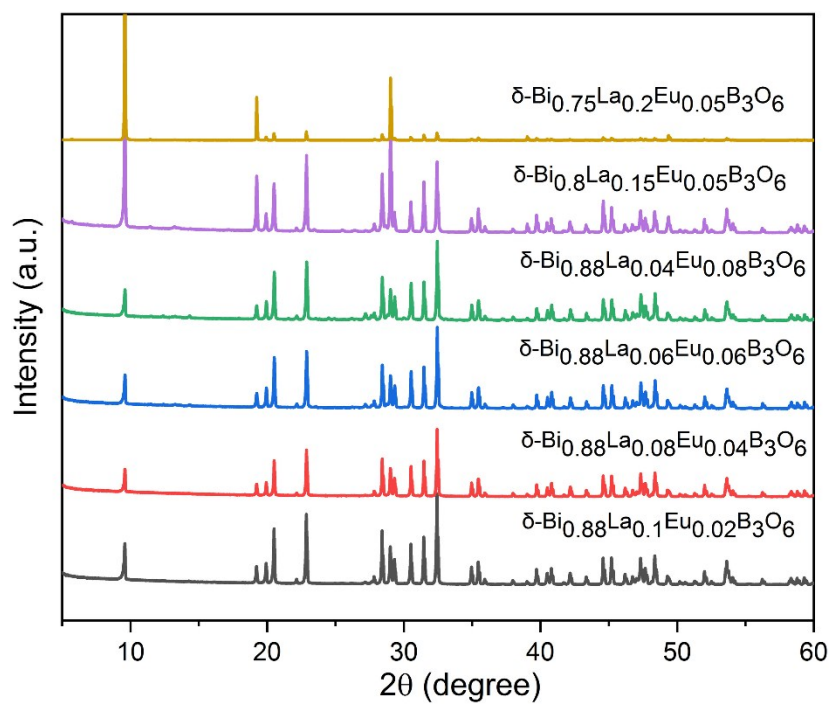

Figure S5. Powder XRD patterns of  $\delta\text{-Bi}_{1-x-y}\text{La}_x\text{Eu}_y\text{B}_3\text{O}_6$ .
